# Supplementary material for: Potentially antibreast cancer enamidines via azide–alkyne–amine coupling and their molecular docking studies
Source: Royal Society of Chemistry journal article supplement (doi:10.1039/c6ra20583f), 2016-01-01

**Potentially antibreast cancer enamidines *via* azide-alkyne-amine coupling and their molecular docking studies**

Prakash Bansode<sup>a</sup>, JagannathJadhav<sup>a</sup>, RajanikantKurane<sup>a</sup>, PrafullaChoudhari<sup>b</sup>, Manish Bhatia<sup>b</sup>,  
Sharanabasappa Khanapure<sup>a</sup>, Rajashri Salunkhe<sup>a</sup>and Gajanan Rashinkar<sup>a\*</sup>

<sup>a</sup>*Department of Chemistry, Shivaji University, Kolhapur, 416004, M.S., India.*

<sup>b</sup>*Department of Pharmaceutical Chemistry, BharatiVidyapeeth College of Pharmacy, Kolhapur, 416013, M.S., India*

\*Corresponding authore-mail: gsr\_chem@unishivaji.ac.in

Phone: +91 231 260 9169; Fax: +91 231 2692333.

**Supporting Information**

|                                                                          |           |
|--------------------------------------------------------------------------|-----------|
| <b>1. General Information.....</b>                                       | <b>2</b>  |
| <b>2. Crystallographic data.....</b>                                     | <b>3</b>  |
| <b>3. <sup>1</sup>H and <sup>13</sup>C NMR Spectra for Products.....</b> | <b>14</b> |

## 1. General Information

### 1.1 Materials

Unless otherwise stated, all commercial reagents and solvents were used without additional purification. Analytical thin layer chromatography (TLC) was performed on Merck precoated silica gel 60F 254 plates. All other chemicals were obtained from local suppliers or synthesized according to the literature procedures.

### 1.2 Methods

The visualization on TLC was achieved by the use of UV light (254 nm). Column chromatography was undertaken on silica gel (60-120 mesh).  $^1\text{H}$  NMR was recorded on 300 MHz spectrometer. Chemical shifts were quoted in parts per million (ppm) referenced to the appropriate solvent peak or 0.0 ppm for tetramethylsilane (TMS). The following abbreviations were used to describe peak patterns when appropriate: s = singlet, d = doublet, t = triplet, q = quartet, m = multiplet. Coupling constant,  $J$ , was reported in Hertz unit (Hz).  $^{13}\text{C}$  NMR was recorded on 75 MHz spectrometer and was fully decoupled by broad band decoupling. Chemical shifts were reported in ppm referenced to the center line of a triplet at 77.0 ppm of chloroform-d.

## 2. Crystallographic Data:

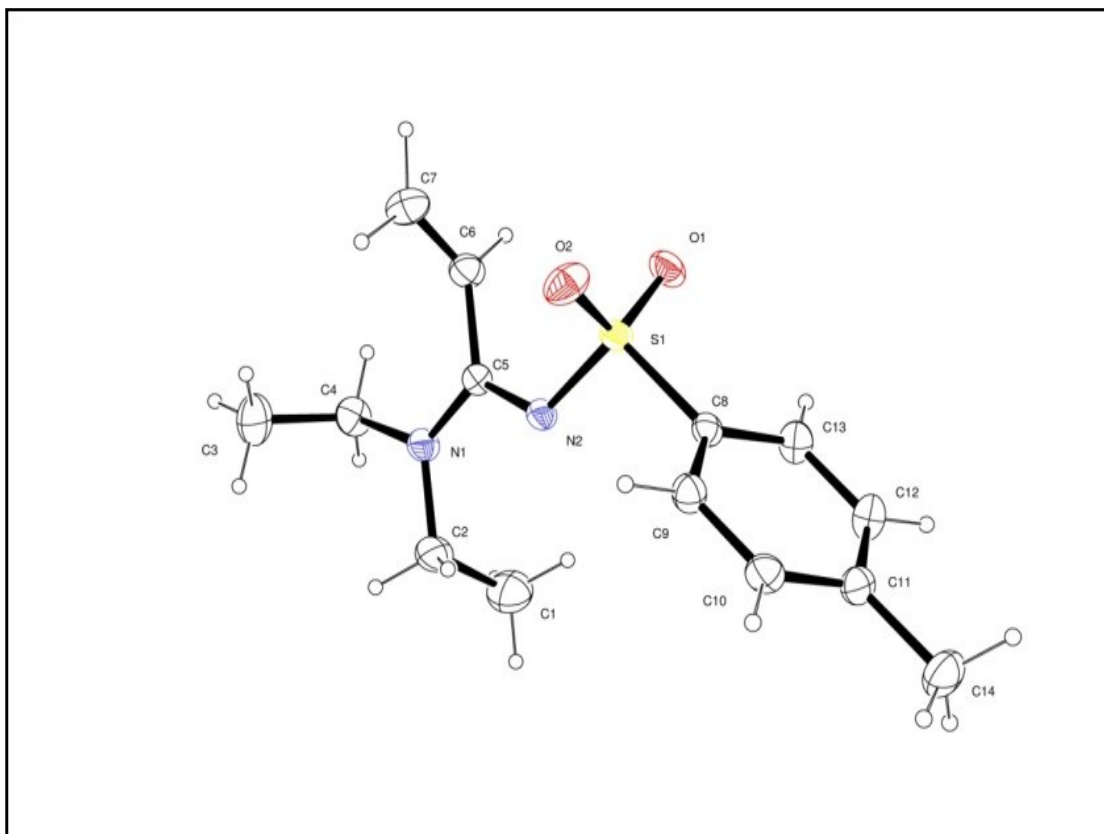

**ORTEP Drawing of Compound 4a**

**Table 1. Crystal data and structure refinement for 4a**

|                             |                                                                 |
|-----------------------------|-----------------------------------------------------------------|
| Identification code         | <b>4a</b>                                                       |
| Empirical formula           | C <sub>14</sub> H <sub>20</sub> N <sub>2</sub> O <sub>2</sub> S |
| Formula weight              | 280.38                                                          |
| Temperature                 | 296(2) K                                                        |
| Wavelength                  | 0.71073 Å                                                       |
| Crystal system, space group | monoclinic, space group P2 <sub>1</sub> / <sup>n</sup>          |
| Unit cell dimensions        | a = 6.605 Å alpha = 90 deg.                                     |

|                                   |                                             |                   |
|-----------------------------------|---------------------------------------------|-------------------|
|                                   | b = 13.973 Å                                | beta = 94.04 deg. |
|                                   | c = 16.200 Å                                | gamma = 90 deg.   |
| Volume                            | 1491.4 Å <sup>3</sup>                       |                   |
| Z, Calculated density             | 4, 1.249 Mg/m <sup>3</sup>                  |                   |
| Absorption coefficient            | 0.217 mm <sup>-1</sup>                      |                   |
| F(000)                            | 600                                         |                   |
| Crystal size                      | 0.20 x 0.20 x 0.15 mm                       |                   |
| Theta range for data collection   | 2.52 to 24.99 deg.                          |                   |
| Limiting indices                  | -7<=h<=7, -16<=k<=16, -19<=l<=19            |                   |
| Reflections collected / unique    | 12478 / 2615 [R(int) = 0.0183]              |                   |
| Completeness to theta = 24.99     | 99.7 %                                      |                   |
| Max. and min. transmission        | 0.9682 and 0.9579                           |                   |
| Refinement method                 | Full-matrix least-squares on F <sup>2</sup> |                   |
| Data / restraints / parameters    | 2615 / 3 / 184                              |                   |
| Goodness-of-fit on F <sup>2</sup> | 1.041                                       |                   |
| Final R indices [I>2sigma(I)]     | R1 = 0.0474, wR2 = 0.1303                   |                   |
| R indices (all data)              | R1 = 0.0536, wR2 = 0.1395                   |                   |
| Largest diff. peak and hole       | 0.574 and -0.303 e.Å <sup>-3</sup>          |                   |

**Table 2. Atomic coordinates ( $\times 10^4$ ) and equivalent isotropic displacement parameters ( $\text{\AA}^2 \times 10^3$ ) for 0231\_200. U(eq) is defined as one third of the trace of the orthogonalized Uij tensor**

|       | xy       | z       | U(eq)    |        |
|-------|----------|---------|----------|--------|
| C(1)  | 4754(6)  | 4330(3) | 10948(2) | 101(1) |
| C(2)  | 2866(5)  | 3961(2) | 10538(2) | 73(1)  |
| C(3)  | -628(5)  | 2581(3) | 11113(2) | 88(1)  |
| C(4)  | 1618(4)  | 2544(2) | 11304(2) | 62(1)  |
| C(5)  | 3623(3)  | 2352(2) | 10076(1) | 42(1)  |
| C(6)  | 3559(4)  | 1294(2) | 10203(2) | 59(1)  |
| C(7)  | 2161(6)  | 742(2)  | 9914(2)  | 85(1)  |
| C(8)  | 7067(3)  | 3053(2) | 8348(1)  | 42(1)  |
| C(9)  | 6130(4)  | 3656(2) | 7758(2)  | 51(1)  |
| C(10) | 7234(4)  | 4371(2) | 7411(2)  | 55(1)  |
| C(11) | 9282(4)  | 4489(2) | 7631(1)  | 52(1)  |
| C(12) | 10191(4) | 3873(2) | 8212(2)  | 61(1)  |
| C(13) | 9099(4)  | 3157(2) | 8570(2)  | 56(1)  |
| C(14) | 10486(5) | 5265(2) | 7241(2)  | 78(1)  |
| N(1)  | 2747(3)  | 2909(1) | 10614(1) | 53(1)  |
| N(2)  | 4555(3)  | 2764(1) | 9481(1)  | 45(1)  |
| O(1)  | 7096(3)  | 1469(1) | 9178(1)  | 65(1)  |
| O(2)  | 4207(3)  | 1784(1) | 8181(1)  | 71(1)  |
| S(1)  | 5660(1)  | 2142(1) | 8803(1)  | 44(1)  |

**Table 3. Bond lengths [Å] and angles [deg] for 4a**

---

|             |           |
|-------------|-----------|
| C(1)-C(2)   | 1.464(5)  |
| C(1)-H(1A)  | 0.9600    |
| C(1)-H(1B)  | 0.9600    |
| C(1)-H(1C)  | 0.9600    |
| C(2)-N(1)   | 1.478(3)  |
| C(2)-H(2A)  | 0.9700    |
| C(2)-H(2B)  | 0.9700    |
| C(3)-C(4)   | 1.495(4)  |
| C(3)-H(3A)  | 0.9600    |
| C(3)-H(3B)  | 0.9600    |
| C(3)-H(3C)  | 0.9600    |
| C(4)-N(1)   | 1.478(3)  |
| C(4)-H(4A)  | 0.9700    |
| C(4)-H(4B)  | 0.9700    |
| C(5)-N(2)   | 1.312(3)  |
| C(5)-N(1)   | 1.330(3)  |
| C(5)-C(6)   | 1.494(3)  |
| C(6)-C(7)   | 1.267(4)  |
| C(6)-H(6)   | 1.060(18) |
| C(7)-H(7')  | 1.082(19) |
| C(7)-H(7'') | 1.076(19) |
| C(8)-C(13)  | 1.373(3)  |
| C(8)-C(9)   | 1.386(3)  |
| C(8)-S(1)   | 1.768(2)  |
| C(9)-C(10)  | 1.380(3)  |
| C(9)-H(9)   | 0.9300    |
| C(10)-C(11) | 1.384(3)  |
| C(10)-H(10) | 0.9300    |
| C(11)-C(12) | 1.381(4)  |

|                  |            |
|------------------|------------|
| C(11)-C(14)      | 1.510(3)   |
| C(12)-C(13)      | 1.384(4)   |
| C(12)-H(12)      | 0.9300     |
| C(13)-H(13)      | 0.9300     |
| C(14)-H(14A)     | 0.9600     |
| C(14)-H(14B)     | 0.9600     |
| C(14)-H(14C)     | 0.9600     |
| N(2)-S(1)        | 1.6143(18) |
| O(1)-S(1)        | 1.4391(18) |
| O(2)-S(1)        | 1.4324(18) |
| C(2)-C(1)-H(1A)  | 109.5      |
| C(2)-C(1)-H(1B)  | 109.5      |
| H(1A)-C(1)-H(1B) | 109.5      |
| C(2)-C(1)-H(1C)  | 109.5      |
| H(1A)-C(1)-H(1C) | 109.5      |
| H(1B)-C(1)-H(1C) | 109.5      |
| C(1)-C(2)-N(1)   | 111.2(3)   |
| C(1)-C(2)-H(2A)  | 109.4      |
| N(1)-C(2)-H(2A)  | 109.4      |
| C(1)-C(2)-H(2B)  | 109.4      |
| N(1)-C(2)-H(2B)  | 109.4      |
| H(2A)-C(2)-H(2B) | 108        |
| C(4)-C(3)-H(3A)  | 109.5      |
| C(4)-C(3)-H(3B)  | 109.5      |
| H(3A)-C(3)-H(3B) | 109.5      |
| C(4)-C(3)-H(3C)  | 109.5      |
| H(3A)-C(3)-H(3C) | 109.5      |
| H(3B)-C(3)-H(3C) | 109.5      |
| N(1)-C(4)-C(3)   | 112.2(2)   |
| N(1)-C(4)-H(4A)  | 109.2      |
| C(3)-C(4)-H(4A)  | 109.2      |

|                    |            |
|--------------------|------------|
| N(1)-C(4)-H(4B)    | 109.2      |
| C(3)-C(4)-H(4B)    | 109.2      |
| H(4A)-C(4)-H(4B)   | 107.9      |
| N(2)-C(5)-N(1)     | 118.2(2)   |
| N(2)-C(5)-C(6)     | 123.7(2)   |
| N(1)-C(5)-C(6)     | 118.1(2)   |
| C(7)-C(6)-C(5)     | 125.4(3)   |
| C(7)-C(6)-H(6)     | 108.6(19)  |
| C(5)-C(6)-H(6)     | 126.0(19)  |
| C(6)-C(7)-H(7')    | 121(2)     |
| C(6)-C(7)-H(7'')   | 110(3)     |
| H(7')-C(7)-H(7'')  | 129(4)     |
| C(13)-C(8)-C(9)    | 119.8(2)   |
| C(13)-C(8)-S(1)    | 120.01(17) |
| C(9)-C(8)-S(1)     | 120.20(17) |
| C(10)-C(9)-C(8)    | 119.9(2)   |
| C(10)-C(9)-H(9)    | 120.1      |
| C(8)-C(9)-H(9)     | 120.1      |
| C(9)-C(10)-C(11)   | 121.1(2)   |
| C(9)-C(10)-H(10)   | 119.5      |
| C(11)-C(10)-H(10)  | 119.5      |
| C(12)-C(11)-C(10)  | 118.1(2)   |
| C(12)-C(11)-C(14)  | 121.1(2)   |
| C(10)-C(11)-C(14)  | 120.8(2)   |
| C(11)-C(12)-C(13)  | 121.4(2)   |
| C(11)-C(12)-H(12)  | 119.3      |
| C(13)-C(12)-H(12)  | 119.3      |
| C(8)-C(13)-C(12)   | 119.7(2)   |
| C(8)-C(13)-H(13)   | 120.1      |
| C(12)-C(13)-H(13)  | 120.1      |
| C(11)-C(14)-H(14A) | 109.5      |



|                     |            |
|---------------------|------------|
| C(11)-C(14)-H(14B)  | 109.5      |
| H(14A)-C(14)-H(14B) | 109.5      |
| C(11)-C(14)-H(14C)  | 109.5      |
| H(14A)-C(14)-H(14C) | 109.5      |
| H(14B)-C(14)-H(14C) | 109.5      |
| C(5)-N(1)-C(2)      | 120.0(2)   |
| C(5)-N(1)-C(4)      | 124.0(2)   |
| C(2)-N(1)-C(4)      | 116.0(2)   |
| C(5)-N(2)-S(1)      | 121.44(16) |
| O(2)-S(1)-O(1)      | 117.19(13) |
| O(2)-S(1)-N(2)      | 110.76(11) |
| O(1)-S(1)-N(2)      | 112.38(10) |
| O(2)-S(1)-C(8)      | 107.67(11) |
| O(1)-S(1)-C(8)      | 107.25(10) |
| N(2)-S(1)-C(8)      | 99.97(10)  |

---

Symmetry transformations used to generate equivalent atoms:

**Table 4. Anisotropic displacement parameters ( $\text{\AA}^2 \times 10^3$ ) for 4a. The anisotropic displacement factor exponent takes the form:  $-2 \pi^2 [h^2 a^{*2} U_{11} + \dots + 2 h k a^* b^* U_{12}]$**

|       | U11 | U22    | U33    | U23    | U13    | U12   |        |
|-------|-----|--------|--------|--------|--------|-------|--------|
| C(1)  |     | 115(3) | 85(2)  | 105(3) | -25(2) | 15(2) | -11(2) |
| C(2)  |     | 88(2)  | 58(2)  | 79(2)  | -14(1) | 40(2) | 0(2)   |
| C(3)  |     | 71(2)  | 120(3) | 75(2)  | 16(2)  | 29(2) | -3(2)  |
| C(4)  |     | 74(2)  | 73(2)  | 41(1)  | 3(1)   | 19(1) | 3(1)   |
| C(5)  |     | 43(1)  | 43(1)  | 40(1)  | 1(1)   | 3(1)  | 2(1)   |
| C(6)  |     | 70(2)  | 47(1)  | 61(2)  | 9(1)   | 18(1) | 3(1)   |
| C(7)  |     | 96(2)  | 51(2)  | 108(3) | 8(2)   | 17(2) | -9(2)  |
| C(8)  |     | 45(1)  | 44(1)  | 37(1)  | -2(1)  | 11(1) | 4(1)   |
| C(9)  |     | 46(1)  | 56(1)  | 53(1)  | 6(1)   | 4(1)  | 4(1)   |
| C(10) |     | 64(2)  | 53(1)  | 51(1)  | 12(1)  | 8(1)  | 9(1)   |
| C(11) |     | 61(1)  | 54(1)  | 43(1)  | -3(1)  | 18(1) | -4(1)  |
| C(12) |     | 47(1)  | 80(2)  | 57(1)  | 7(1)   | 6(1)  | -7(1)  |
| C(13) |     | 48(1)  | 68(2)  | 50(1)  | 14(1)  | 1(1)  | 4(1)   |
| C(14) |     | 88(2)  | 74(2)  | 76(2)  | 11(2)  | 26(2) | -17(2) |
| N(1)  |     | 61(1)  | 49(1)  | 51(1)  | -2(1)  | 21(1) | 2(1)   |
| N(2)  |     | 49(1)  | 39(1)  | 47(1)  | 0(1)   | 15(1) | 3(1)   |
| O(1)  |     | 72(1)  | 49(1)  | 76(1)  | 15(1)  | 27(1) | 20(1)  |
| O(2)  |     | 88(1)  | 68(1)  | 55(1)  | -11(1) | 5(1)  | -28(1) |
| S(1)  |     | 53(1)  | 37(1)  | 44(1)  | -3(1)  | 12(1) | 1(1)   |

**Table 5. Hydrogen coordinates (  $\times 10^4$ ) and isotropic displacement parameters ( $\text{\AA}^2 \times 10^3$ ) for 4a**

|        | x        | y        | z         | U(eq)   |
|--------|----------|----------|-----------|---------|
| H(1A)  | 4795     | 5013     | 10887     | 151     |
| H(1B)  | 5891     | 4050     | 10699     | 151     |
| H(1C)  | 4813     | 4169     | 11525     | 151     |
| H(2A)  | 2794     | 4136     | 9958      | 88      |
| H(2B)  | 1718     | 4249     | 10786     | 88      |
| H(3A)  | -1301    | 2336     | 11575     | 132     |
| H(3B)  | -987     | 2199     | 10632     | 132     |
| H(3C)  | -1039    | 3231     | 11009     | 132     |
| H(4A)  | 1971     | 2922     | 11795     | 74      |
| H(4B)  | 2022     | 1887     | 11421     | 74      |
| H(9)   | 4760     | 3579     | 7597      | 62      |
| H(10)  | 6591     | 4781     | 7023      | 67      |
| H(12)  | 11567    | 3940     | 8365      | 73      |
| H(13)  | 9740     | 2749     | 8959      | 67      |
| H(14A) | 9612     | 5619     | 6853      | 117     |
| H(14B) | 11565    | 4981     | 6959      | 117     |
| H(14C) | 11047    | 5690     | 7663      | 117     |
| H(7')  | 2240(60) | -21(15)  | 10030(20) | 125(13) |
| H(7'') | 990(60)  | 1140(30) | 9570(30)  | 180(20) |
| H(6)   | 4660(40) | 880(20)  | 10551(19) | 97(11)  |

**Table 6. Torsion angles [deg] for 4a**

---

|                         |             |
|-------------------------|-------------|
| N(2)-C(5)-C(6)-C(7)     | -93.6(4)    |
| N(1)-C(5)-C(6)-C(7)     | 88.9(4)     |
| C(13)-C(8)-C(9)-C(10)   | -1.4(4)     |
| S(1)-C(8)-C(9)-C(10)    | 179.36(18)  |
| C(8)-C(9)-C(10)-C(11)   | 1.1(4)      |
| C(9)-C(10)-C(11)-C(12)  | -0.2(4)     |
| C(9)-C(10)-C(11)-C(14)  | 179.2(2)    |
| C(10)-C(11)-C(12)-C(13) | -0.3(4)     |
| C(14)-C(11)-C(12)-C(13) | -179.7(3)   |
| C(9)-C(8)-C(13)-C(12)   | 0.9(4)      |
| S(1)-C(8)-C(13)-C(12)   | -179.9(2)   |
| C(11)-C(12)-C(13)-C(8)  | -0.1(4)     |
| N(2)-C(5)-N(1)-C(2)     | -0.9(3)     |
| C(6)-C(5)-N(1)-C(2)     | 176.8(3)    |
| N(2)-C(5)-N(1)-C(4)     | 178.9(2)    |
| C(6)-C(5)-N(1)-C(4)     | -3.4(3)     |
| C(1)-C(2)-N(1)-C(5)     | -84.7(3)    |
| C(1)-C(2)-N(1)-C(4)     | 95.4(3)     |
| C(3)-C(4)-N(1)-C(5)     | -100.8(3)   |
| C(3)-C(4)-N(1)-C(2)     | 79.0(4)     |
| N(1)-C(5)-N(2)-S(1)     | 179.91(17)  |
| C(6)-C(5)-N(2)-S(1)     | 2.4(3)      |
| C(5)-N(2)-S(1)-O(2)     | 79.3(2)     |
| C(5)-N(2)-S(1)-O(1)     | -53.8(2)    |
| C(5)-N(2)-S(1)-C(8)     | -167.31(18) |
| C(13)-C(8)-S(1)-O(2)    | -143.6(2)   |
| C(9)-C(8)-S(1)-O(2)     | 35.6(2)     |
| C(13)-C(8)-S(1)-O(1)    | -16.6(2)    |
| C(9)-C(8)-S(1)-O(1)     | 162.59(18)  |

|                      |          |
|----------------------|----------|
| C(13)-C(8)-S(1)-N(2) | 100.7(2) |
| C(9)-C(8)-S(1)-N(2)  | -80.1(2) |

---

Symmetry transformations used to generate equivalent atoms

**Table 7. Hydrogen bonds for 4a [Å and deg.].**

---

| D-H...A | d(D-H) | d(H...A) | d(D...A) | <(DHA) |
|---------|--------|----------|----------|--------|
|---------|--------|----------|----------|--------|

3.  $^1\text{H}$  and  $^{13}\text{C}$  NMR spectra of enamidines obtained in this study

*N,N*-Diethyl-*N'*-[(4-methylphenyl)sulfonyl]prop-2-enamidamide  
(Table 2, entry 4a)

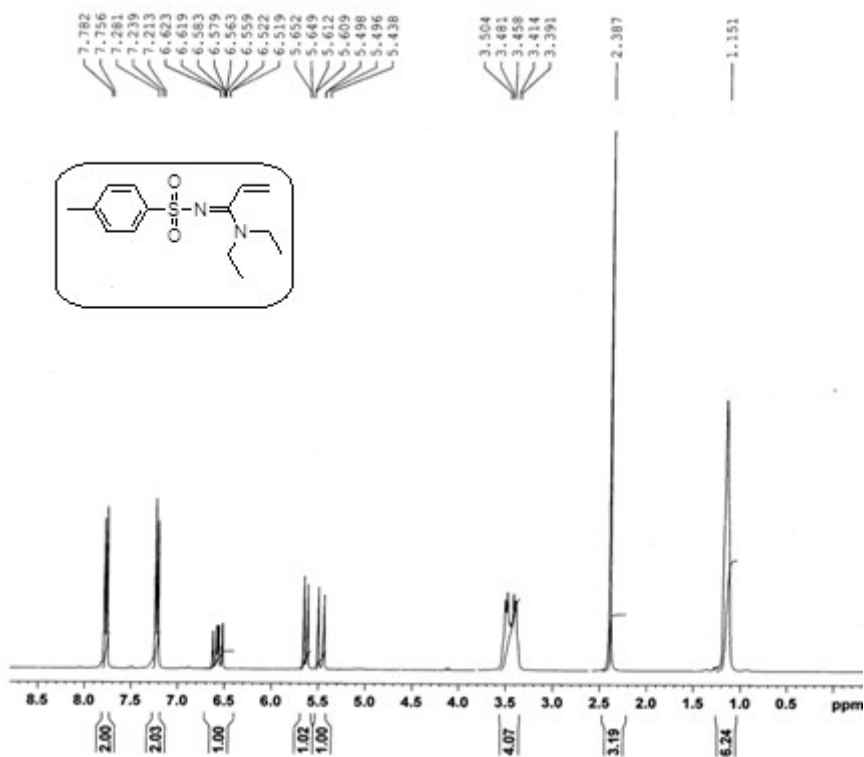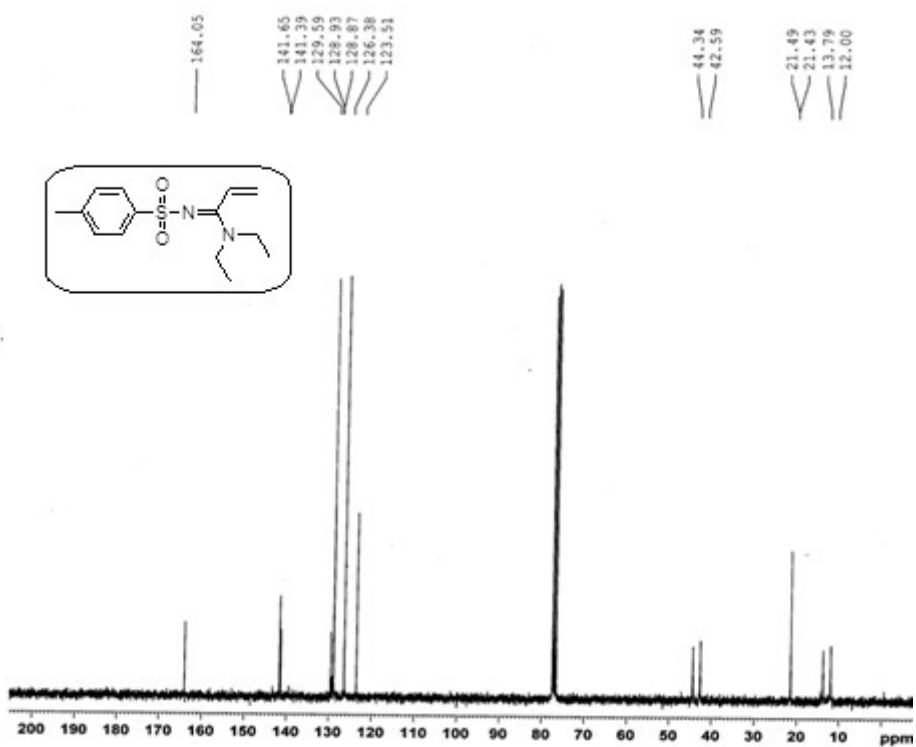

DEPT spectrum of *N,N*-diethyl-*N'*-[(4-methylphenyl)sulfonyl]prop-2-enimidamide  
(Table 2, entry 4a)

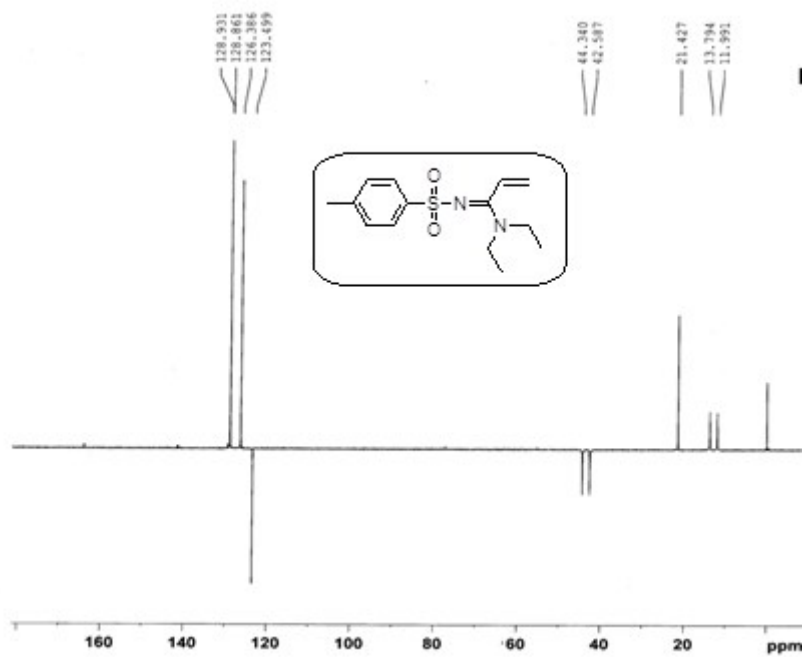

***N,N*-Dimethyl-*N'*-[(4-methylphenyl)sulfonyl]prop-2-enamidamide  
(Table 2, entry 4b)**

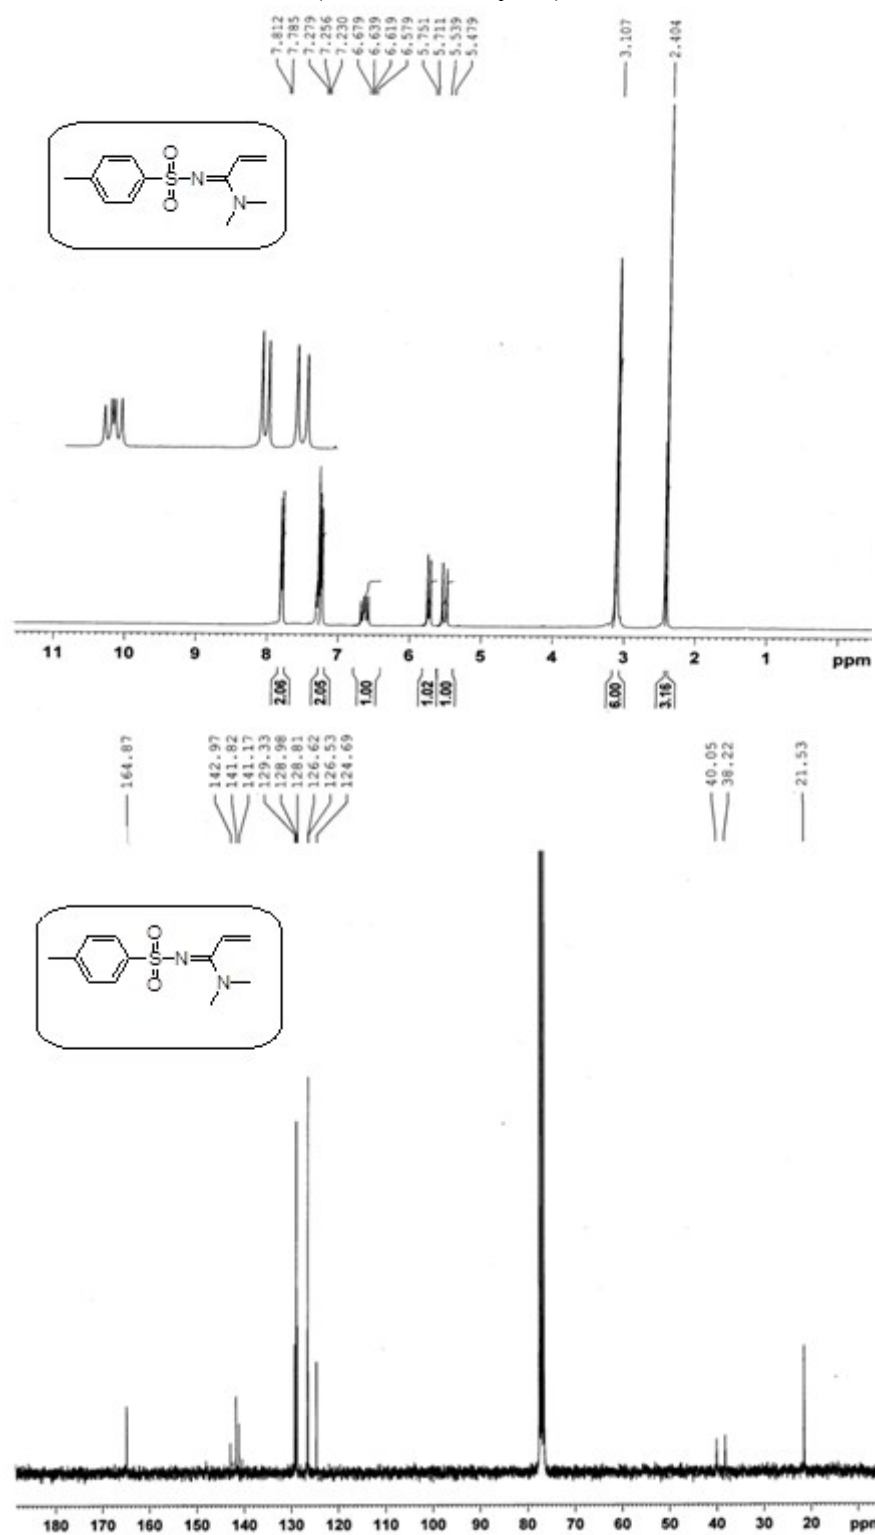



***N'*-(4-Methylphenyl)sulfonyl)-*N,N*-dipropylprop-2-enamidamide  
(Table 2, entry 4c)**

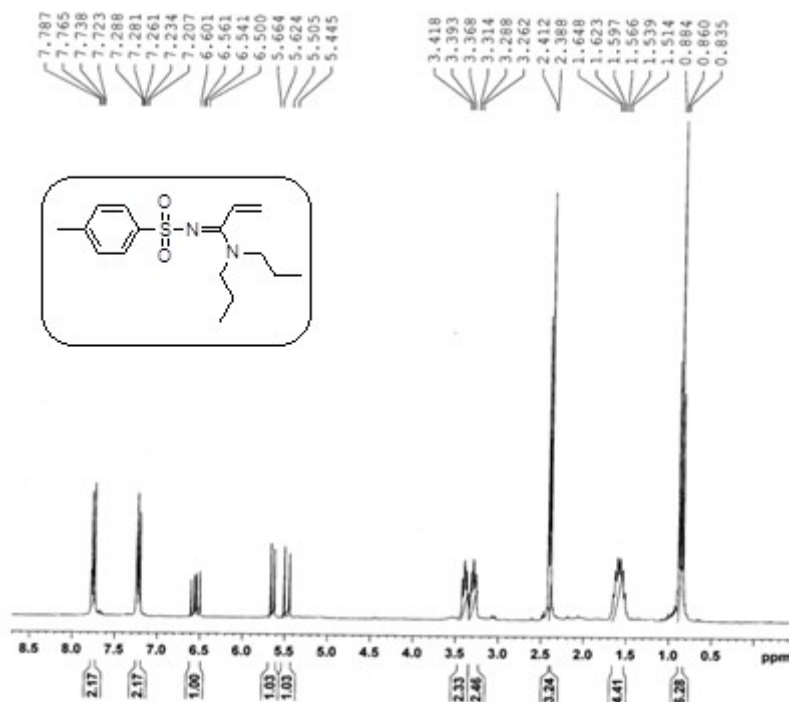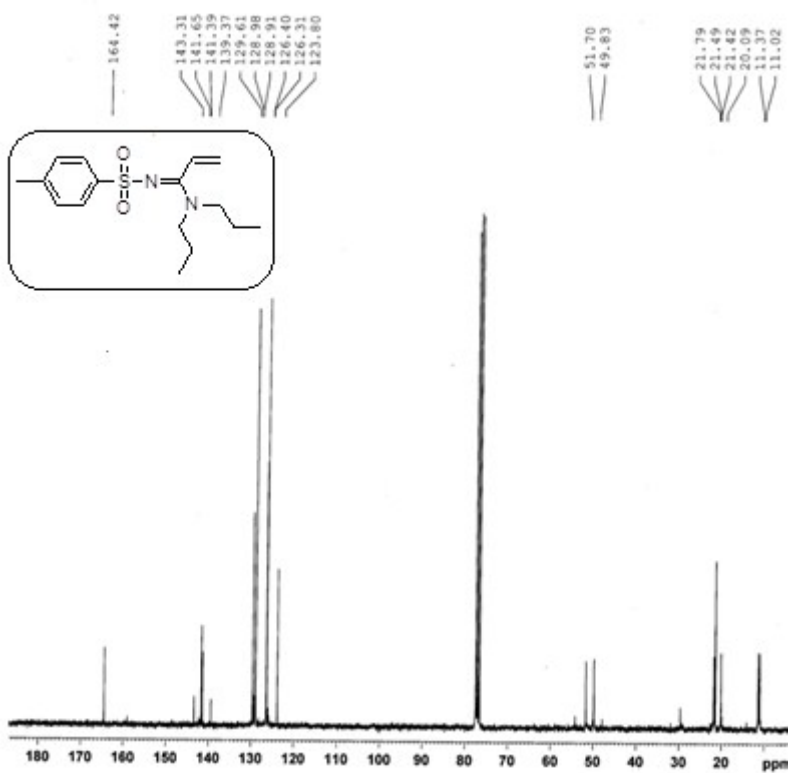

***N,N*-Diisopropyl-*N'*-[(4-methylphenyl)sulfonyl]prop-2-enamidamide  
(Table 2, entry 4d)**

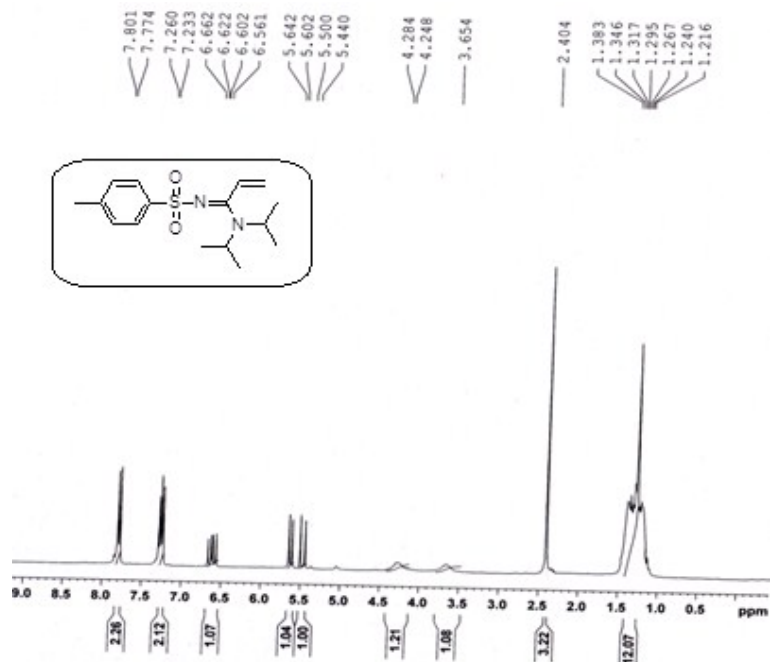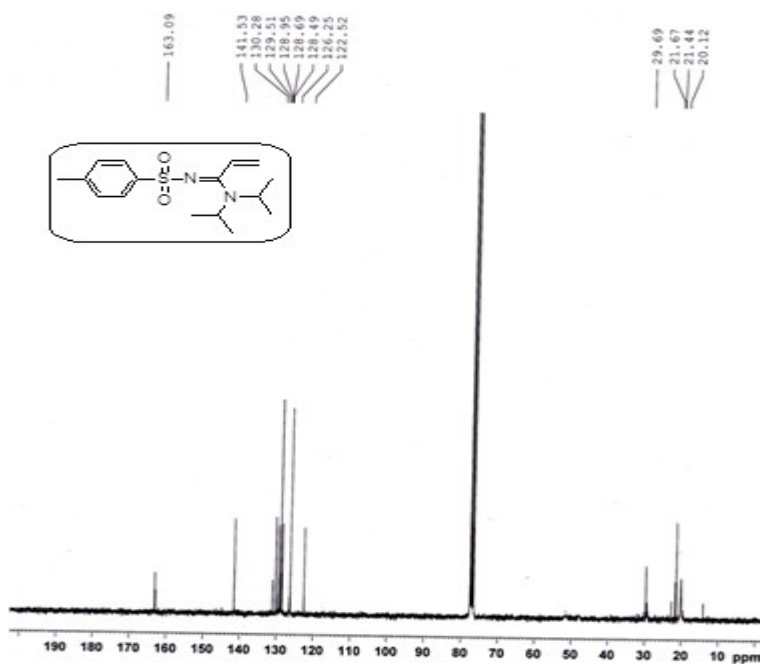

***N'*-(4-Methylphenyl)sulfonyl)-*N,N*-di(*n*-butyl)prop-2-enamidamide  
(Table 2, entry 4e)**

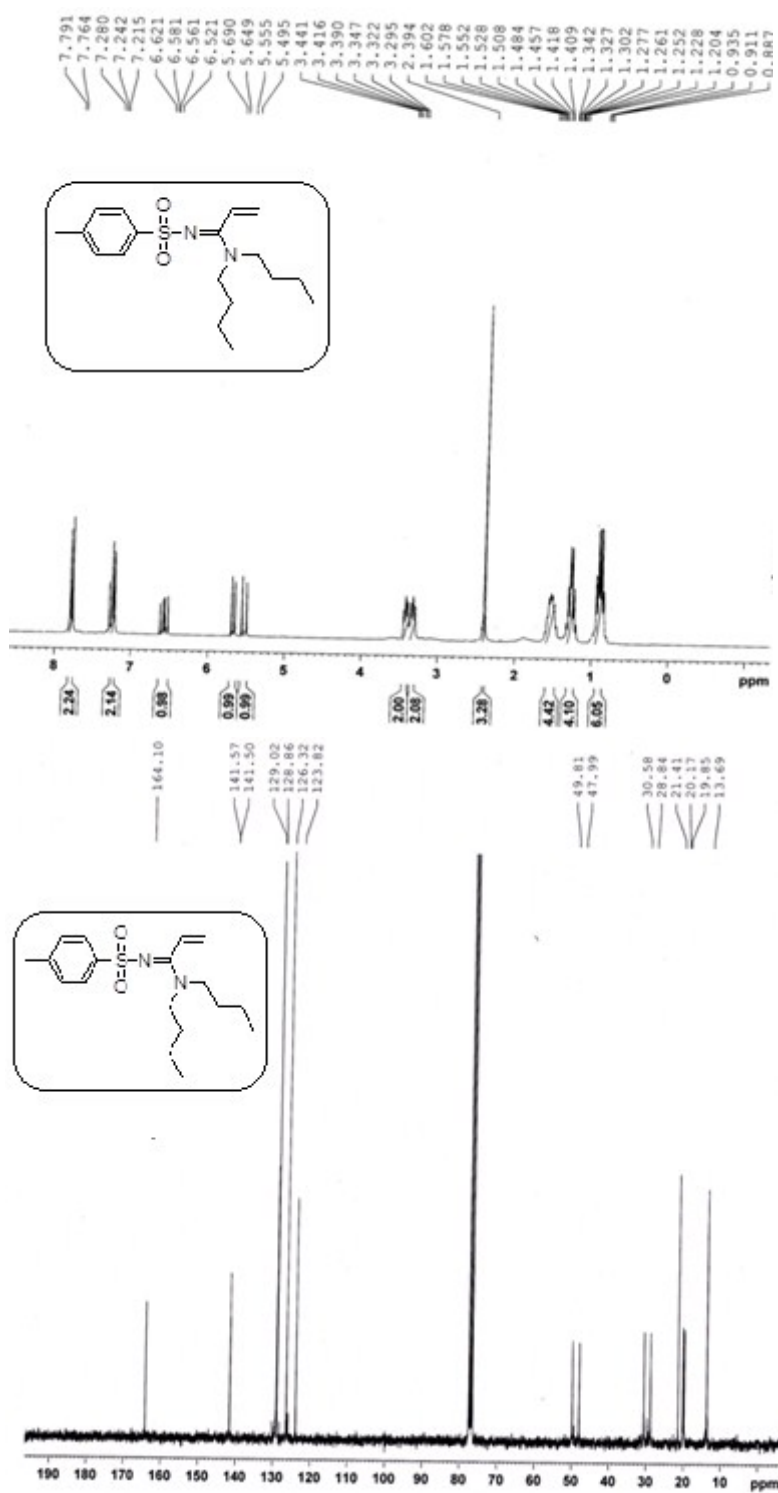

***N'*-[(4-Methylphenyl)sulfonyl]-*N,N*-di(cyclohexyl)prop-2-enamidamide  
(Table 2, entry 4f)**

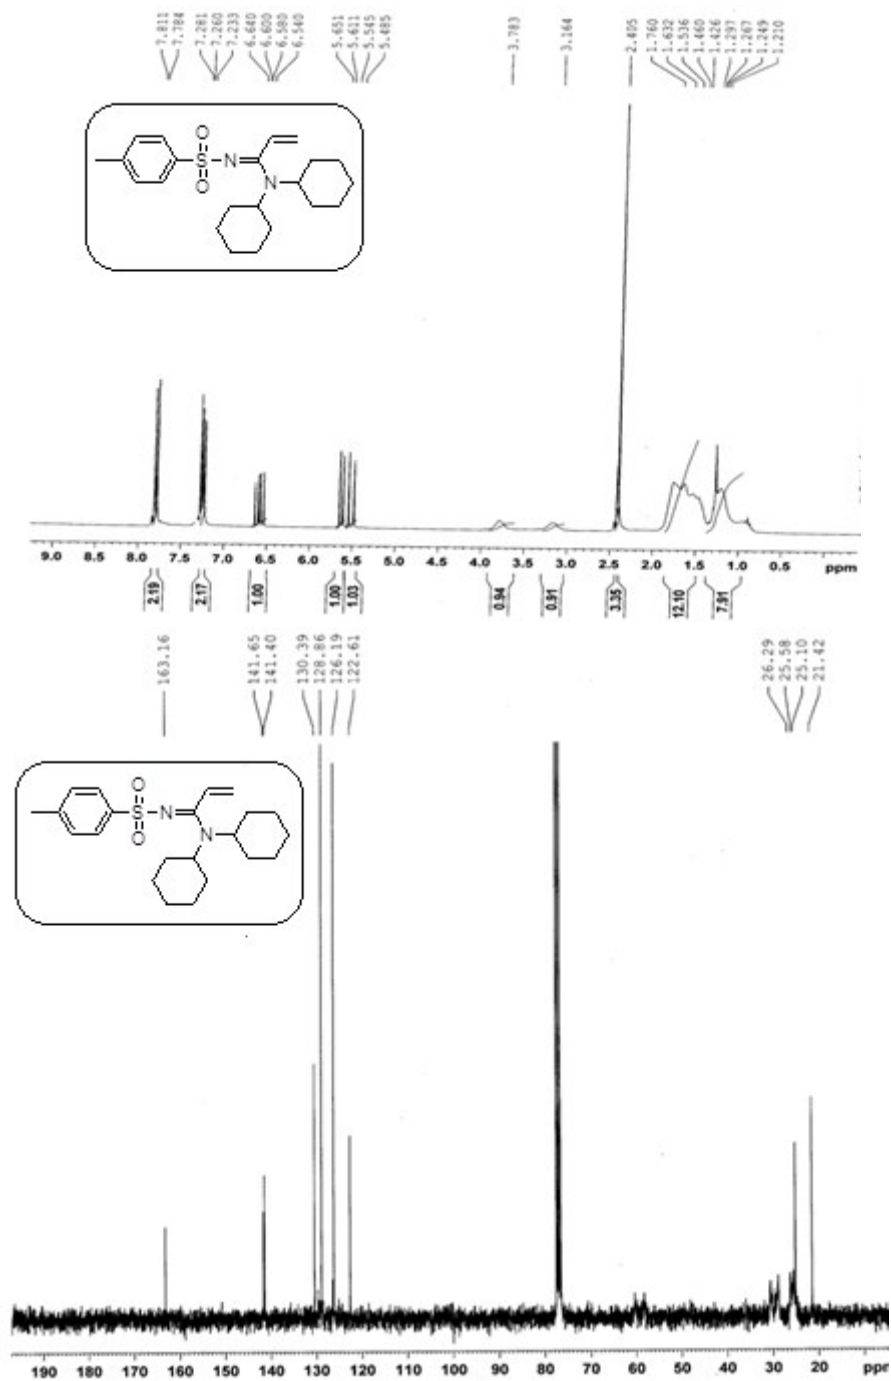

4-Methyl-N-(1-pyrrolidin-1-ylprop-2-en-1-ylidene)benzenesulfonamide  
(Table 2, entry 4g)

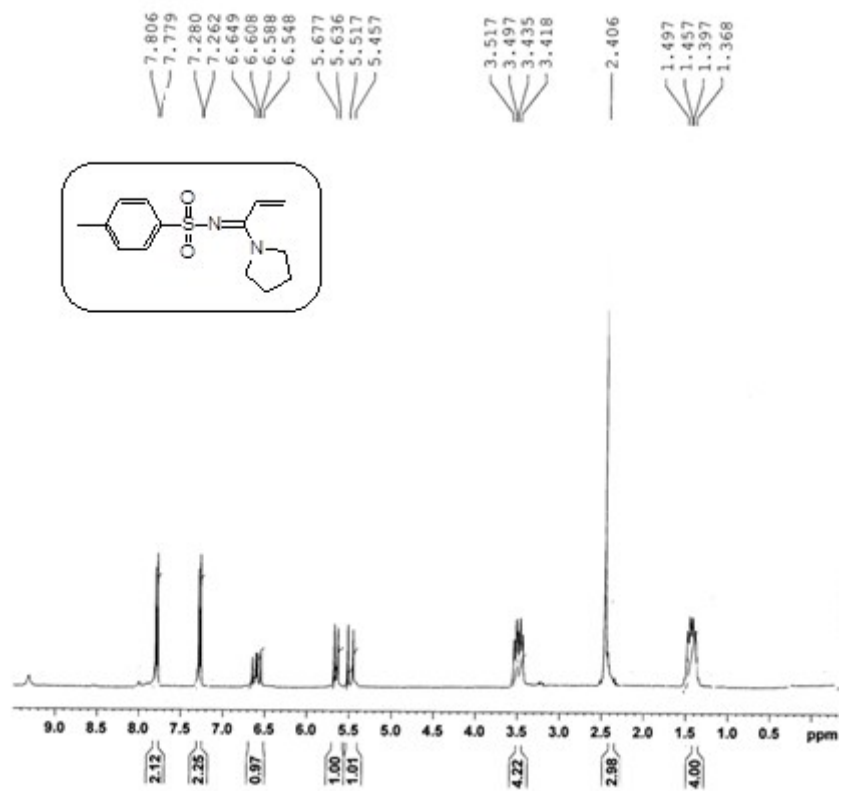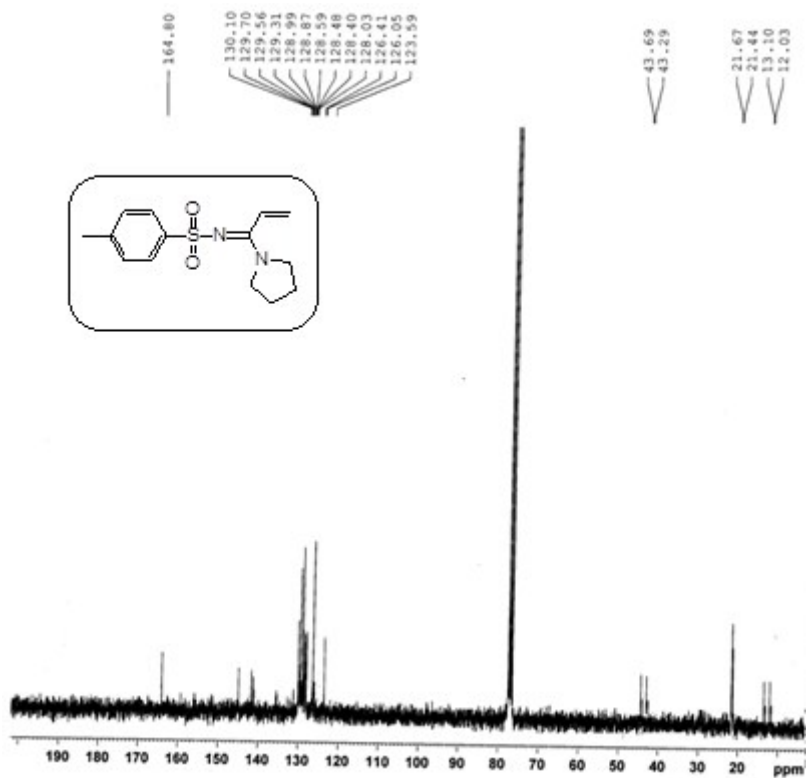

4-Methyl-N-(1-piperidin-1-ylprop-2-en-1-ylidene)benzenesulfonamide  
(Table 2, entry 4h)

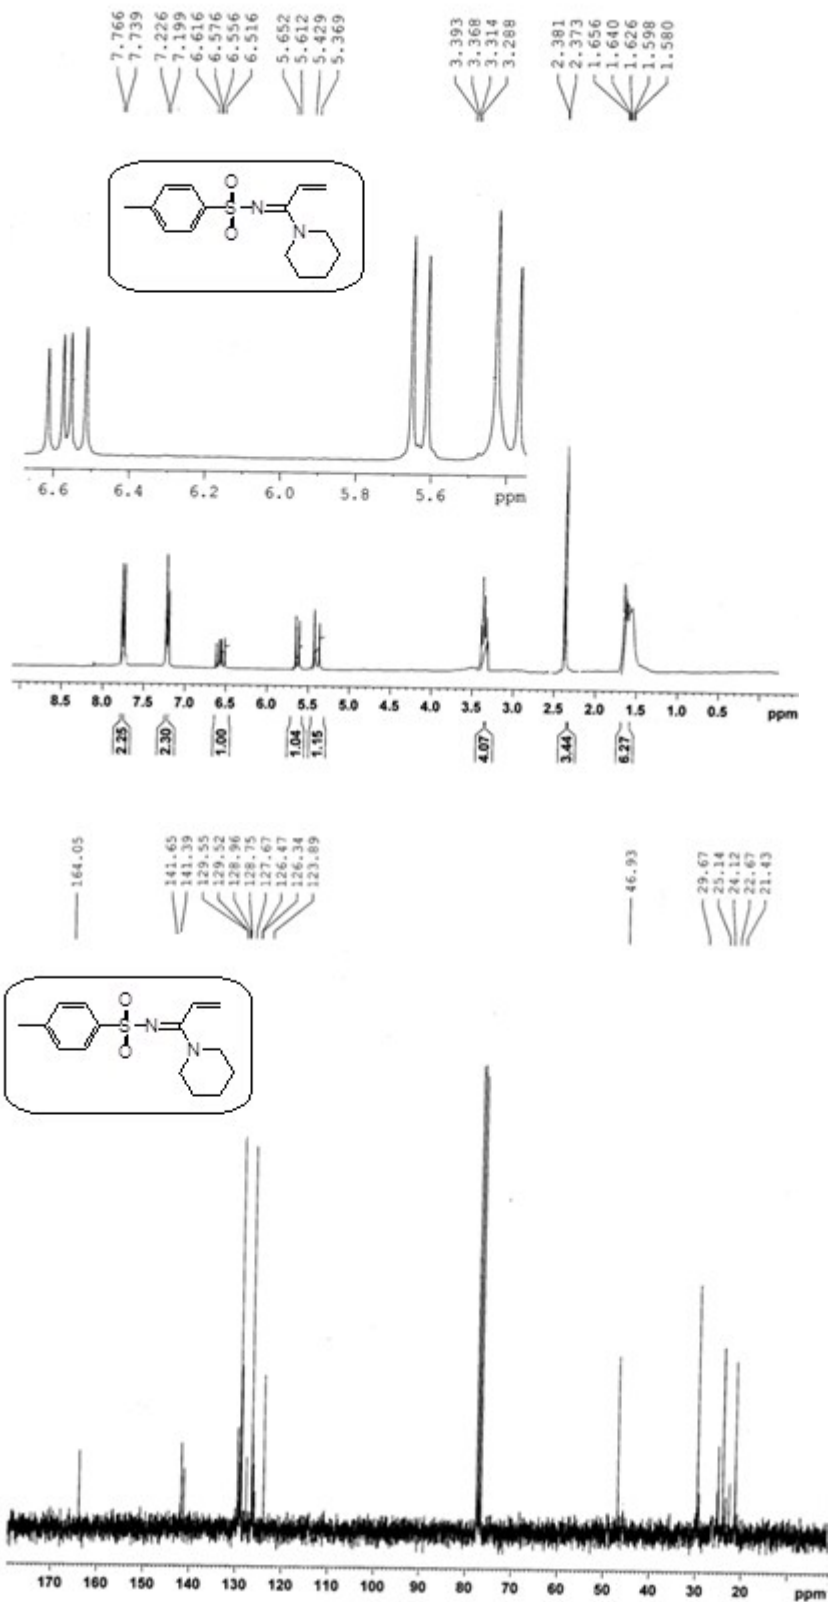

**4-Methyl-N-(1-morpholin-4-ylprop-2-en-1-ylidene)benzenesulfonamide  
(Table 2, entry 4i)**

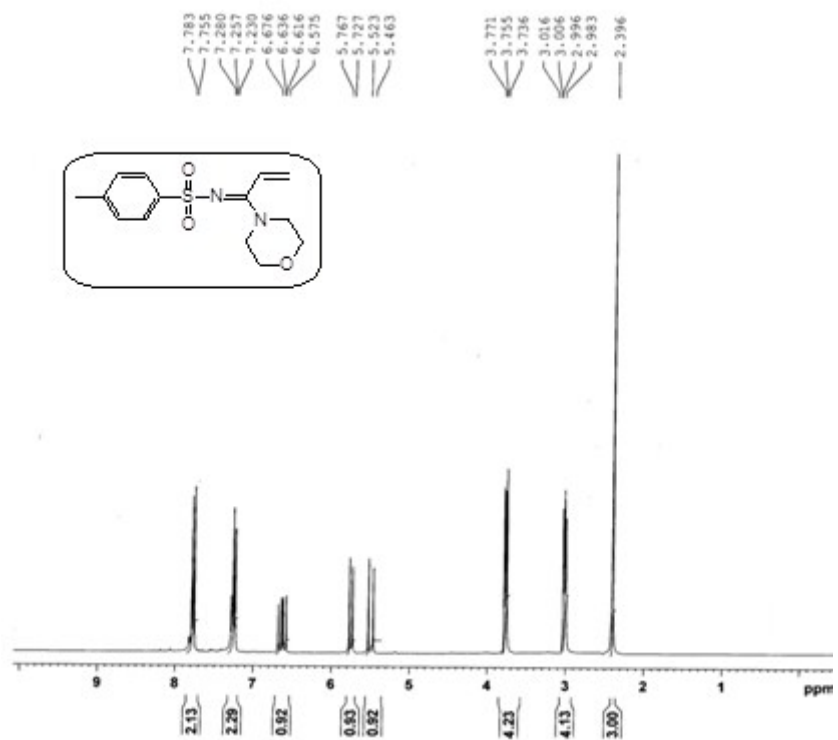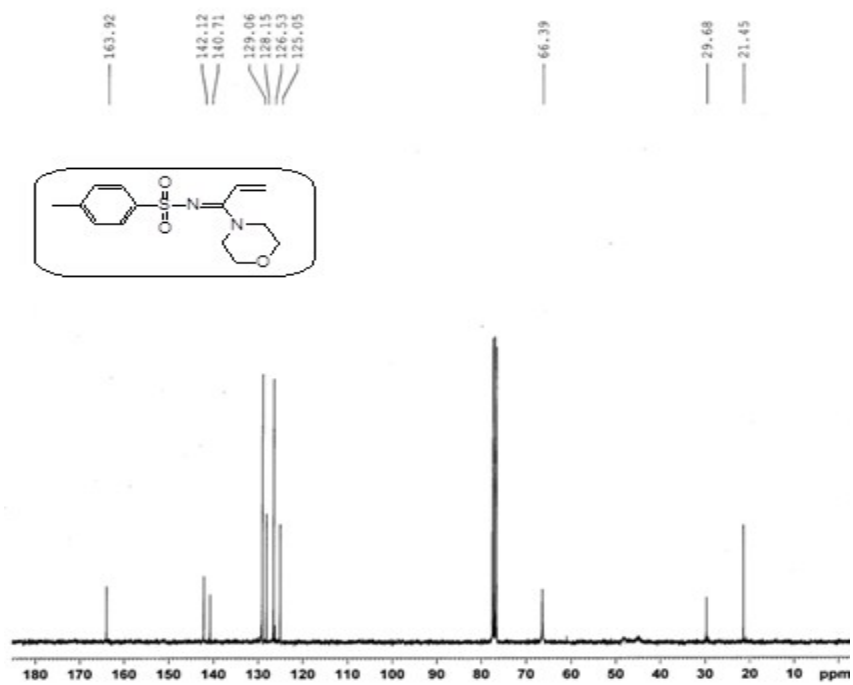

**4-Methyl-N-[1-(octahydro-6H-pyrrolo[3,4-b]pyridin-6-yl)prop-2-en-1-ylidene]benzenesulfonamide (Table 2, entry 4j)**

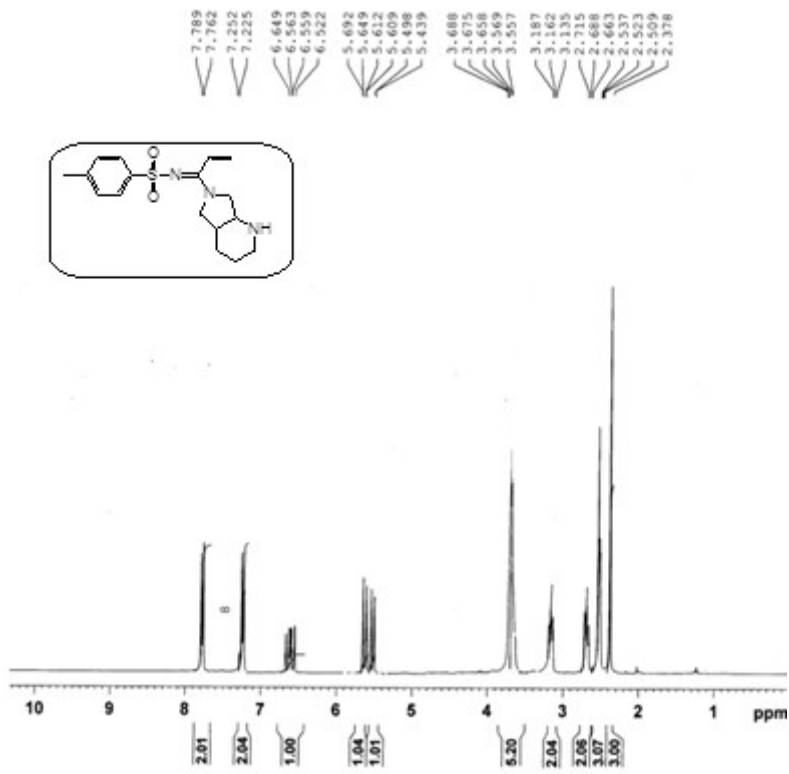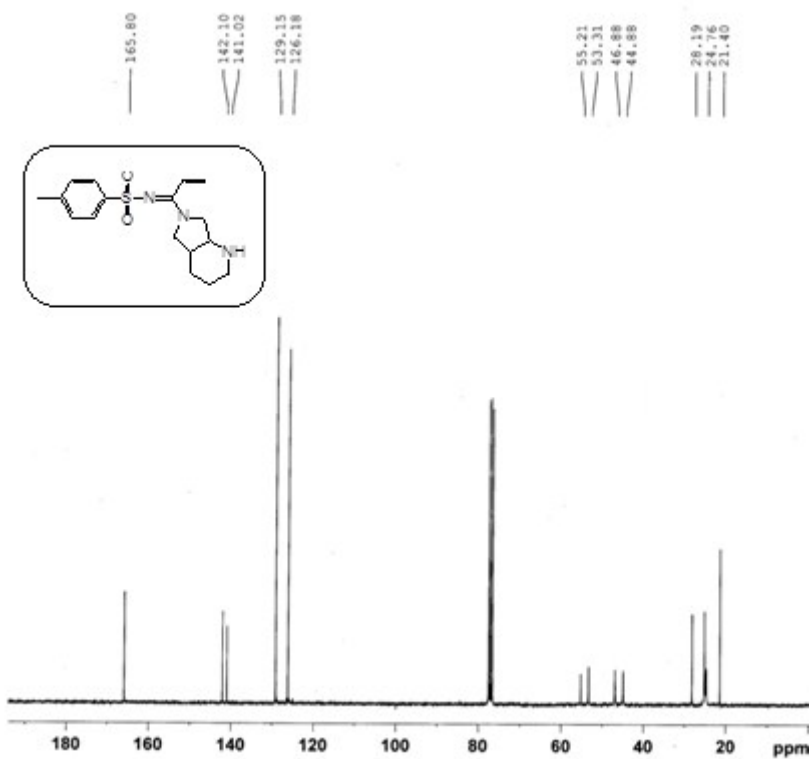



***N*'-[(4-Methylphenyl)sulfonyl]-*N,N*-dibenzylprop-2-enamidamide  
(Table 2, entry 4k)**

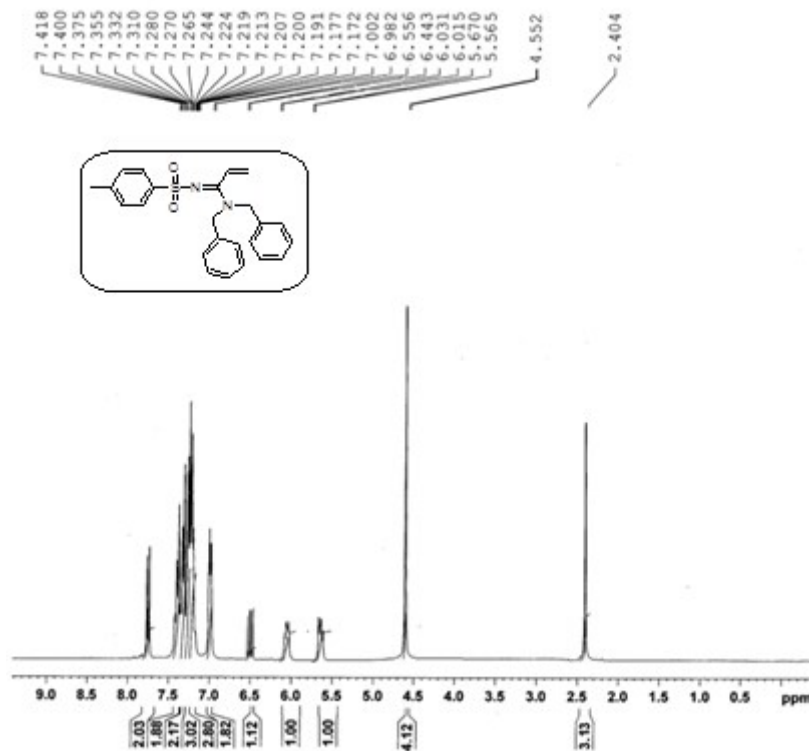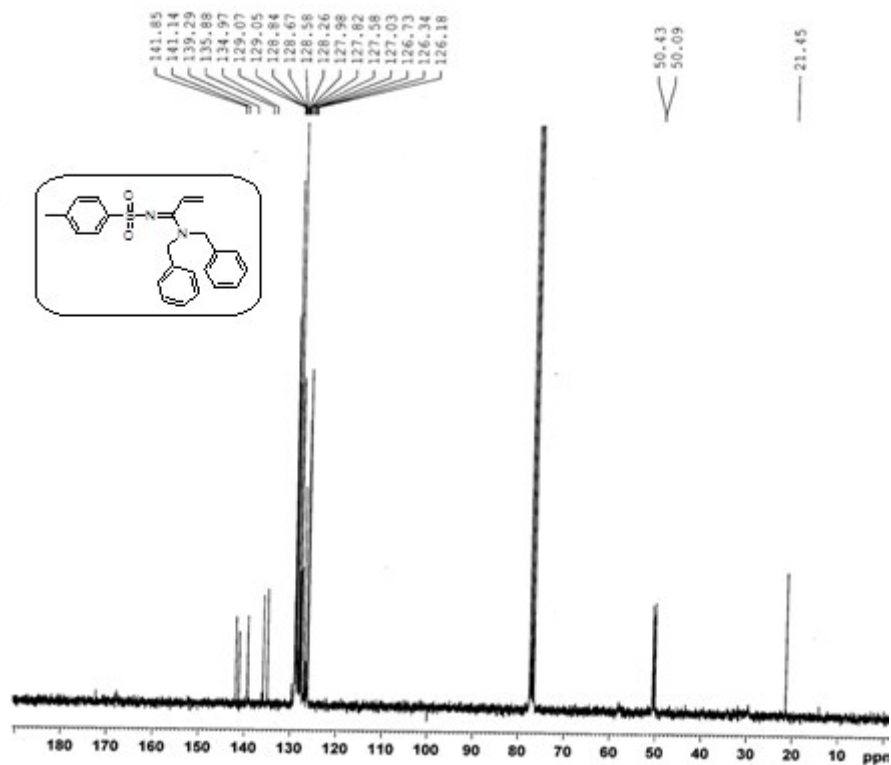

***N'*-[(4-Methylphenyl)sulfonyl]-*N*-phenylprop-2-enamidamide  
(Table 2, entry 4)**

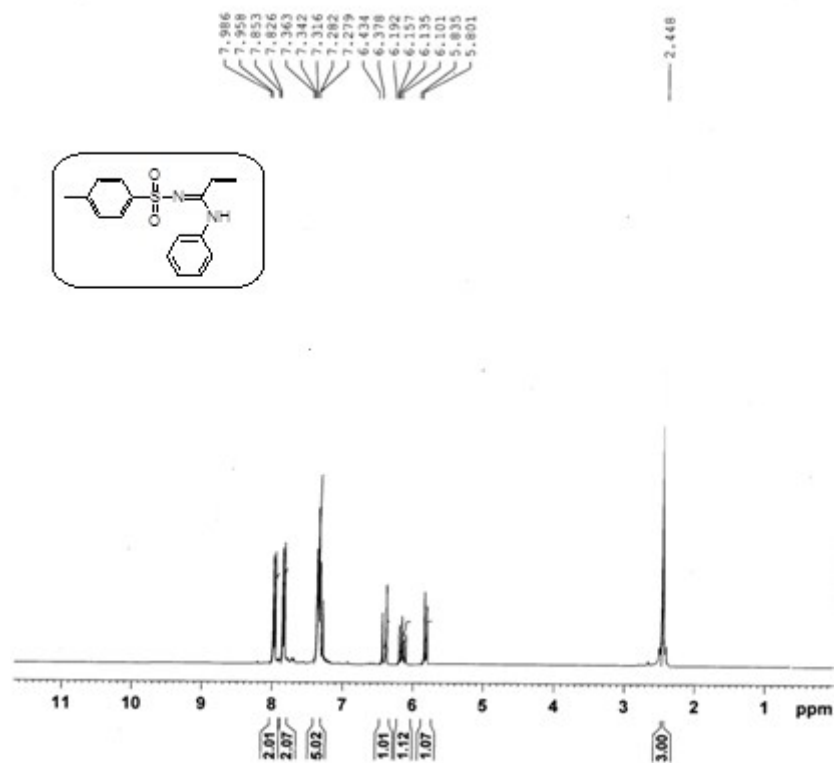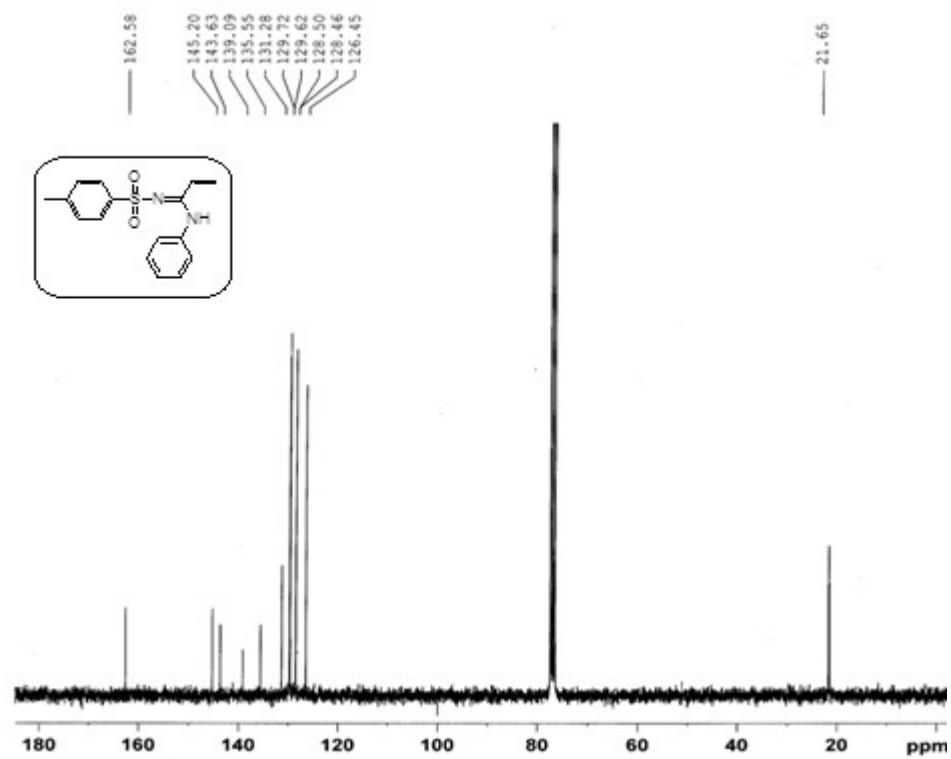

***N*-(2-Methoxyphenyl)-*N'*-[(4-methylphenyl)sulfonyl]prop-2-enamidamide  
(Table 2, entry 4m)**

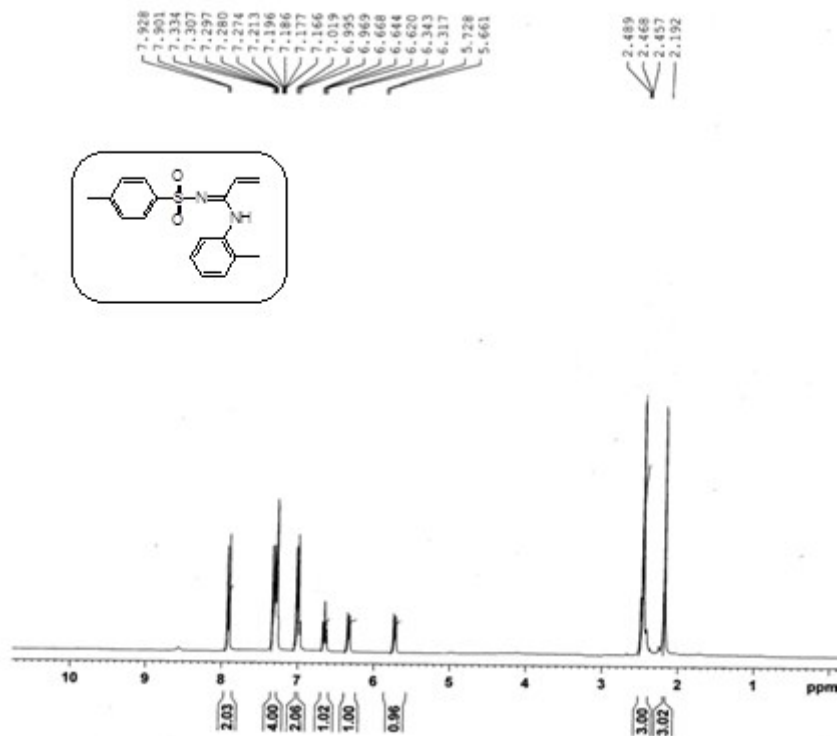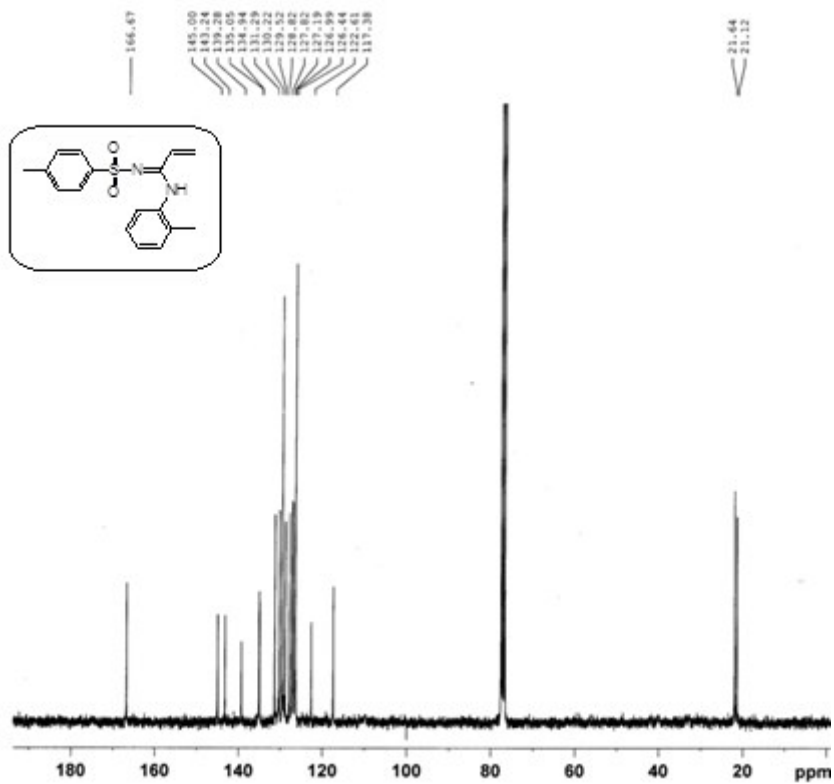

Supplement: c6ra20583f1.pdf [file c6ra20583f1.pdf]
